# Supplementary material for: Unravelling the electronic structure and dynamics of an isolated molecular rotary motor in the gas-phase
Source: Royal Society of Chemistry journal article supplement (doi:10.1039/c7sc01997a), 2017-01-01
Supplement: c7sc01997a1.pdf [file c7sc01997a1.pdf]

## Supplementary Information

### Unravelling the electronic structure and dynamics of an isolated molecular rotary motor in the gas-phase

Reece Beekmeyer,<sup>a</sup> Michael A. Parkes,<sup>a</sup> Luke Ridgewell,<sup>a</sup> Jamie W. Riley,<sup>a</sup> Jiawen Chen,<sup>c</sup> Ben L. Feringa,<sup>c</sup> Andrew Kerridge<sup>b</sup> and Helen H. Fielding<sup>\*a</sup>

<sup>a</sup>Department of Chemistry, University College London, 20 Gordon Street, London WC1H 0AJ, UK

<sup>b</sup>Department of Chemistry, Lancaster University, Lancaster, LA1 4YB, UK

<sup>c</sup>Stratingh Institute for Chemistry, University of Groningen, Nijenborgh 4, 9747 AG Groningen, The Netherlands

## 1 Synthesis

Chemicals were purchased from Acros, Aldrich, Fluka or Merck and were used as received. Solvents for extraction and chromatography were technical grade. All solvents used in reactions were freshly distilled from appropriate drying agents before use. All reactions were performed under inert atmosphere (Ar). Analytical TLC was performed with Merck silica gel 60 F254 plates and visualization was accomplished by UV light. Flash chromatography was carried out using Merck silica gel 60 (230-400 mesh ASTM). Solvents for spectroscopic studies were of spectrophotometric grade (UVASOL Merck). Melting points were taken on a Mettler FP-2 melting point apparatus equipped with a Mettler FP-21 microscope. NMR spectra were recorded on Varian AMX400 (1H: 400 MHz, 13C: 100 MHz). The deuterated solvents were treated with Na<sub>2</sub>CO<sub>3</sub>, molecular sieves (4 Å) and degassed by argon prior to use. Chemical shifts are denoted in parts per million (ppm) relative to the residual solvent peak. The splitting parameters are designated as follows: s = singlet, d = doublet, t = triplet, q = quartet, m = multiplet, dd = doublet of doublets. High-resolution mass spectrometry (ESIMS) was performed on a LTQ Orbitrap XL spectrometer with ESI ionization. Compounds S1 and S2 were prepared according to literature procedures.<sup>[1,2]</sup>

### Compound S3

Lawesson's reagent (322 mg, 0.8 mmol) was added to a solution of **S1** (79 mg, 0.4 mmol) in toluene (10 mL). The mixture was stirred at 110 °C for 2 h after which the solvent was evaporated. The residue was purified by flash column (SiO<sub>2</sub>, pentane:CH<sub>2</sub>Cl<sub>2</sub> = 10:1) to obtain the thioketone intermediate as a brown oil. Meanwhile, MnO<sub>2</sub> (175 mg, 2 mmol) was added to a solution of hydrazone **S2** (101 mg, 0.4 mmol) in

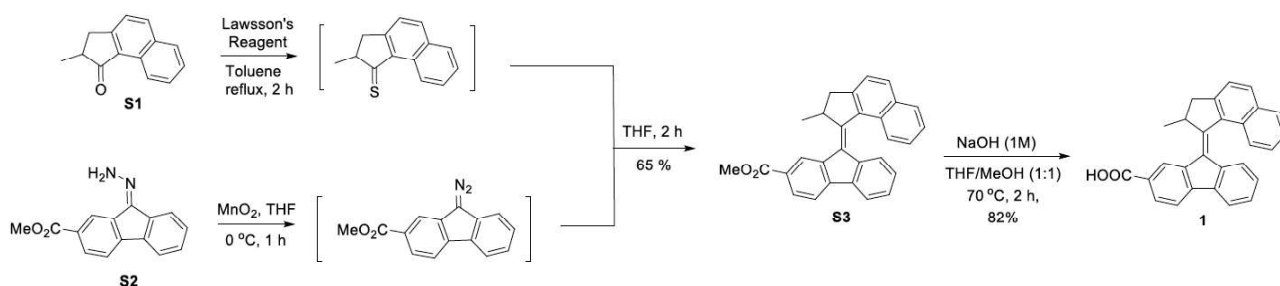

Scheme 1: Synthesis of motor **1**.

THF (15 mL) at 0 °C. After 1 h, the mixture was filtered under N<sub>2</sub>, and the obtained pink solution was immediately added to the thioketone intermediate. This mixture was stirred for another 2 h and then concentrated *in vacuo*. The crude residue was purified by column chromatography (SiO<sub>2</sub>, pentane:ethyl acetate = 1:3) to give compound **S3** (104 mg, 65%) as an oil. <sup>1</sup>H NMR (400 MHz, CDCl<sub>3</sub>) δ 8.08–8.00 (m, 1H), 8.00–7.86 (m, 3H), 7.85–7.69 (m, 2H), 7.59 (dd, *J* = 8.2, 2.6 Hz, 1H), 7.53–7.39 (m, 2H), 7.37–7.21 (m, 2H), 6.96–6.74 (m, 2H), 4.41 (dt, *J* = 22.1, 6.3 Hz, 1H), 4.01 (s, 1H), 3.55 (d, *J* = 0.6 Hz, 3H), 2.80 (dd, *J* = 15.2, 5.4 Hz, 1H), 1.47 (dd, *J* = 16.0, 6.7 Hz, 3H). <sup>13</sup>C NMR (101 MHz, CDCl<sub>3</sub>) δ 166.1, 166.1, 165.8, 147.9, 135.9, 133.2, 132.6, 132.1, 131.9, 131.4, 131.3, 131.1, 130.9, 130.1, 130.0, 129.6, 129.2, 129.1, 128.7, 127.2, 126.8, 126.3, 126.1, 125.4, 125.1, 124.4, 123.9, 84.3, 67.0, 52.4, 52.4, 52.3, 52.2, 41.8, 24.8, 19.4. HRMS (ESI) *m/z*: [M]<sup>+</sup> Calcd for C<sub>29</sub>H<sub>22</sub>O<sub>2</sub> 402.1620, found 402.1633.

## Motor **1**

Ester **S3** (80 mg, 0.2 mmol) was dissolved in THF (5 mL), MeOH (5 mL) and NaOH(aq.) (1M, 5mL) and heated at 70 °C for 12 h. The mixture was cooled to rt and water (5 mL) was added. THF and MeOH were removed by rotary evaporation. A brown precipitate was formed upon titration of the mixture with HCl(aq.) (1M) until pH=1. After filtration, the brown solid was washed with cold water(aq.) (10 mL) and dried *in vacuo*, affording compound **1** as a solid (67 mg, 82%). M.p. 72–74 °C; <sup>1</sup>H NMR (400 MHz, CD<sub>3</sub>OD) δ 8.74 (s, 1H), 8.14–7.93 (m, 3H), 7.92–7.83 (m, 2H), 7.72–7.55 (m, 2H), 7.52–7.21 (m, 4H), 6.90–6.62 (m, 2H), 4.43–4.34 (m, 1H), 3.62 (dd, *J* = 15.4, 5.3 Hz, 1H), 2.85 (dd, *J* = 15.4, 3.7 Hz, 1H), 1.41 (dd, *J* = 13.8, 6.7 Hz, 3H). <sup>13</sup>C NMR (101 MHz, DMSO-*d*<sub>6</sub>) δ 164.4, 151.5, 148.1, 139.7, 139.5, 136.1, 132.7, 132.5, 131.6, 129.3, 128.7, 127.7, 127.5, 127.4, 127.0, 126.9, 126.2, 125.8, 125.4, 124.6, 124.2, 122.5, 120.3, 119.7, 53.1, 45.4, 41.9, 19.5. HRMS (ESI) *m/z*: [M]<sup>+</sup> Calcd for C<sub>28</sub>H<sub>20</sub>O<sub>2</sub> 388.1463, found 388.1470.

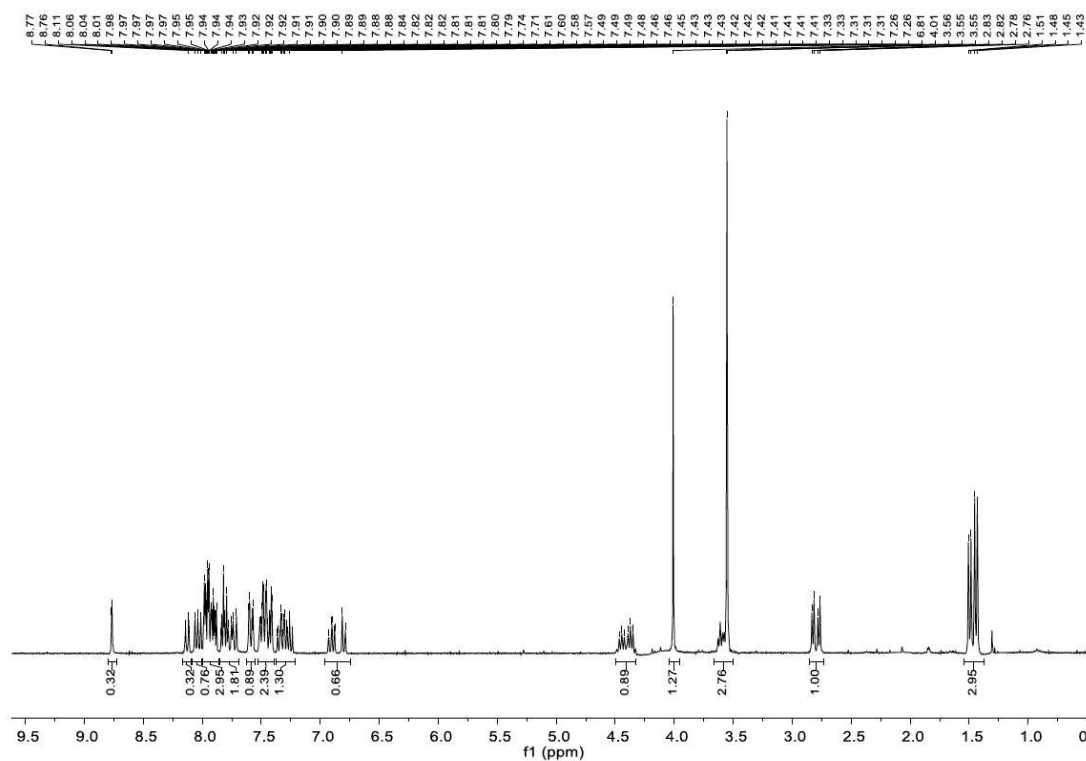

Fig. 1:  $^1\text{H}$  NMR spectrum of **S3** in  $\text{CDCl}_3$  at 400 MHz.

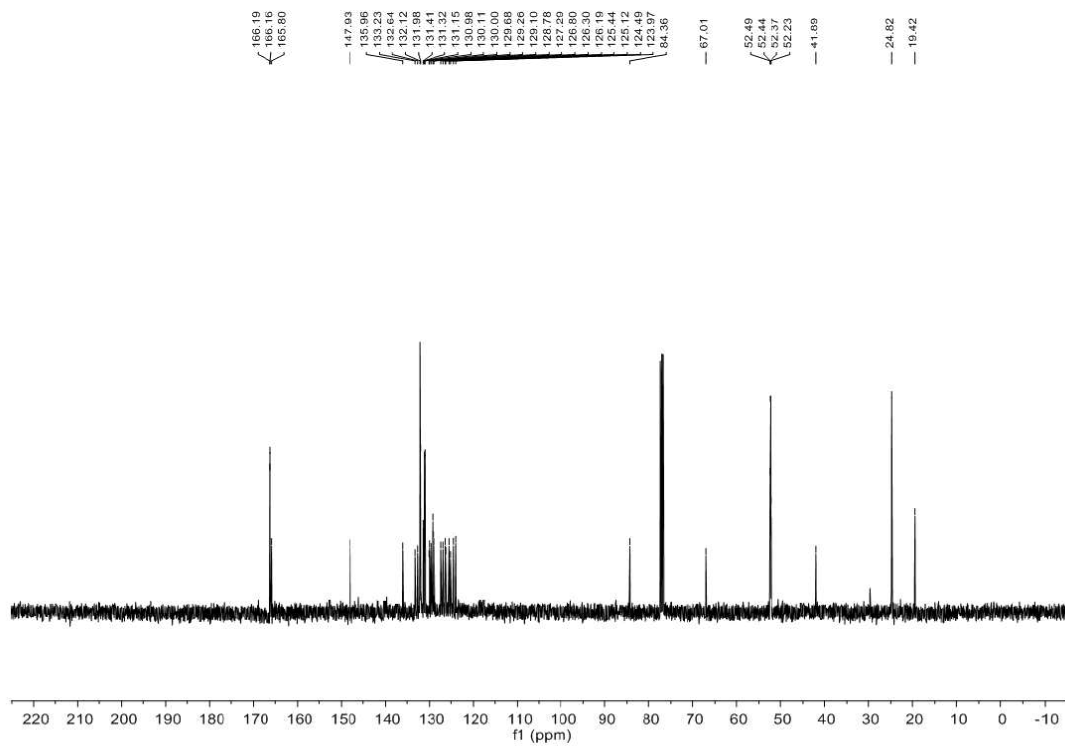

Fig. 2:  $^{13}\text{C}$  NMR spectrum of **S3** in  $\text{CDCl}_3$  at 100 MHz.

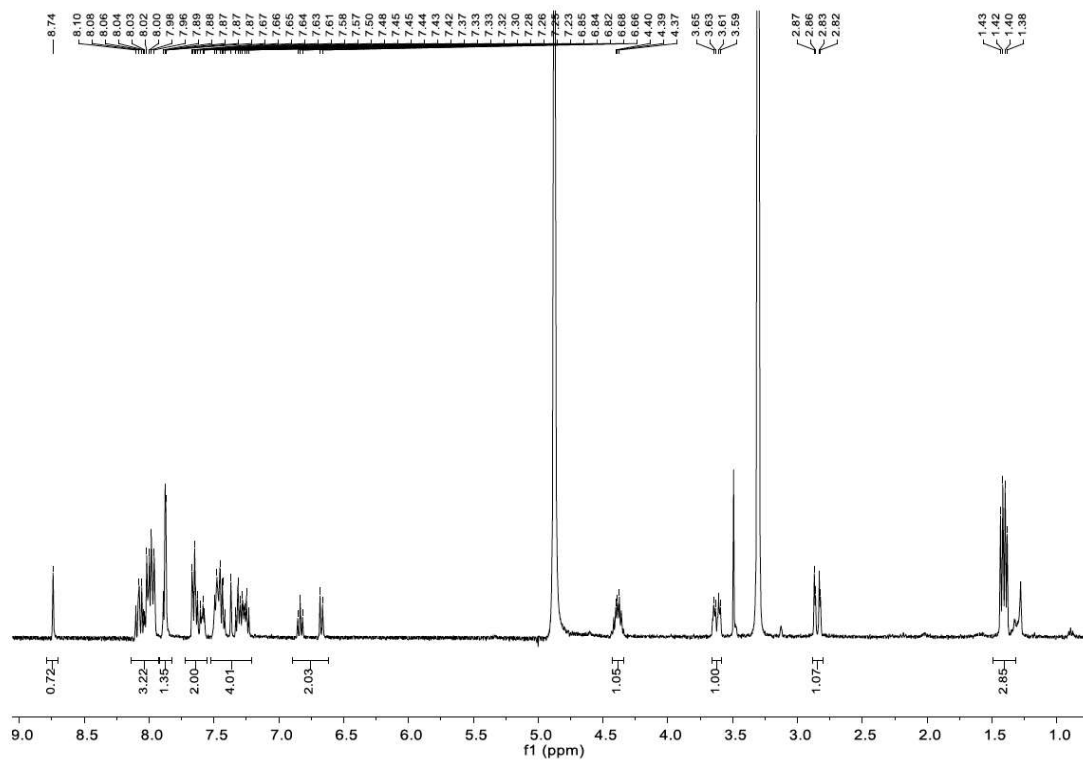

Fig. 3:  $^1\text{H}$  NMR spectrum of **1** in  $\text{CD}_3\text{OD}$  at 400 MHz.

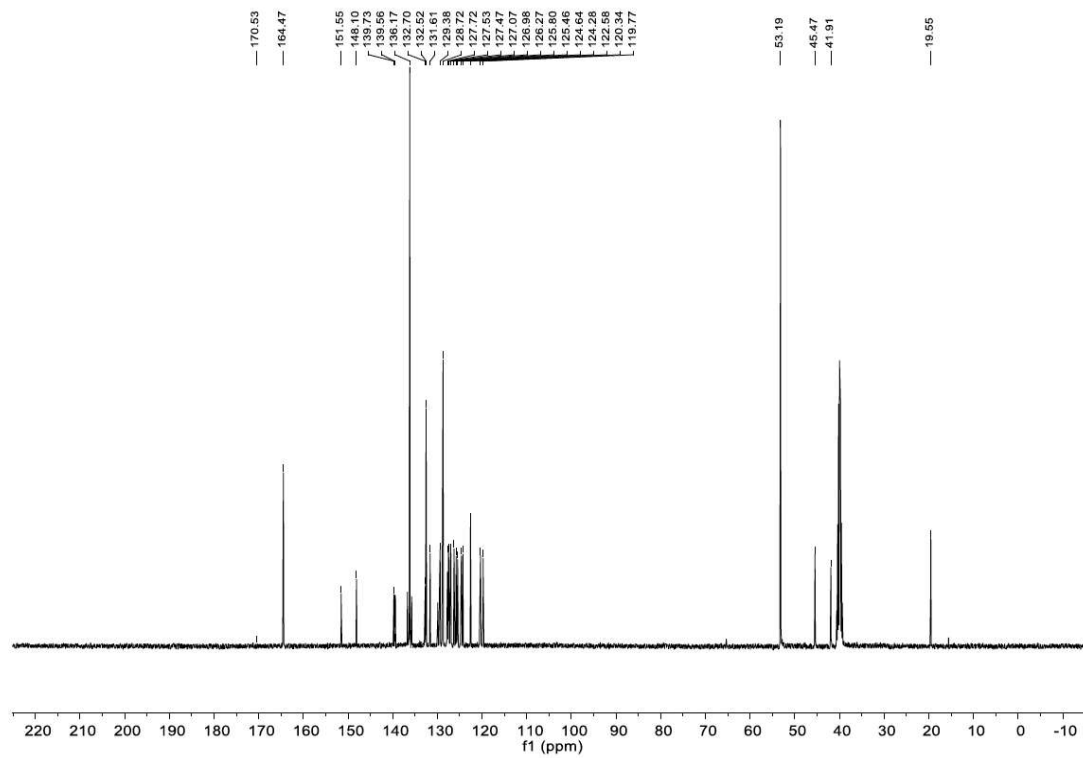

Fig. 4:  $^{13}\text{C}$  NMR spectrum of **1** in  $\text{DMSO}-d_6$  at 100 MHz.

## 2 Computational chemistry

| Atom | x         | y         | z         |
|------|-----------|-----------|-----------|
| H1   | -3.769415 | -3.317061 | -1.967451 |
| H2   | -1.041477 | -3.892669 | -1.603681 |
| H3   | -0.731618 | -2.509728 | -2.650631 |
| H4   | 3.938437  | 3.007079  | 0.060928  |
| H5   | -0.267977 | 5.477466  | -1.086873 |
| H6   | 1.922379  | 4.473002  | -0.507632 |
| H7   | -2.108001 | 1.619327  | -1.001653 |
| H8   | -2.256964 | 4.035894  | -1.361565 |
| H9   | 5.600806  | 1.169125  | 0.445940  |
| H10  | 2.584326  | -1.758670 | 0.203759  |
| H11  | -5.565308 | -2.062252 | -0.825645 |
| H12  | -1.548678 | 0.847467  | 1.651292  |
| H13  | -3.343053 | 1.884584  | 2.950378  |
| H14  | -5.719047 | 1.307032  | 2.500392  |
| H15  | -6.267595 | -0.393742 | 0.804841  |
| H16  | -0.668415 | -3.321226 | 1.066204  |
| H17  | 0.661443  | -4.171317 | 0.265140  |
| H18  | 0.998477  | -2.780765 | 1.286448  |
| H19  | 1.106971  | -2.212901 | -1.172756 |
| C1   | -1.846679 | -1.024657 | -0.326994 |
| C2   | -3.528914 | -2.483621 | -1.318905 |
| C3   | -2.191355 | -2.116083 | -1.114056 |
| C4   | -0.379348 | -0.880570 | -0.330425 |
| C5   | -0.953119 | -2.804829 | -1.619989 |
| C6   | -0.188310 | 4.410570  | -0.920597 |
| C7   | 1.040380  | 3.850092  | -0.583562 |
| C8   | 1.128724  | 2.478779  | -0.375248 |
| C9   | -0.017961 | 1.654026  | -0.470063 |
| C10  | -1.227804 | 2.224249  | -0.855618 |
| C11  | -1.310179 | 3.599291  | -1.071253 |
| C12  | 2.289635  | 1.635390  | -0.121793 |
| C13  | 3.623475  | 1.969954  | 0.074252  |
| C14  | 4.551703  | 0.956509  | 0.292019  |
| C15  | 2.816509  | -0.708584 | 0.141134  |
| C16  | 1.870226  | 0.286466  | -0.100433 |
| C17  | 0.395760  | 0.238281  | -0.275902 |
| C18  | -4.220014 | -0.750665 | 0.232508  |
| C19  | -2.855229 | -0.366401 | 0.441262  |
| C20  | 4.160104  | -0.383302 | 0.328473  |
| C21  | 5.196931  | -1.508939 | 0.581571  |
| C22  | -4.527145 | -1.791273 | -0.678174 |
| C23  | -2.576134 | 0.585012  | 1.451987  |
| C24  | -3.584282 | 1.165409  | 2.178942  |
| C25  | -4.931637 | 0.831856  | 1.929963  |
| C26  | -5.237469 | -0.109275 | 0.982150  |
| C27  | 0.150355  | -2.276443 | -0.661987 |
| C28  | 0.293047  | -3.188990 | 0.565496  |
| O1   | 6.377521  | -1.125766 | 0.726432  |
| O2   | 4.725865  | -2.668504 | 0.610320  |

Table 1: Coordinates in Angstroms of deprotonated molecular motor anion **1a**.

| Atom | x         | y         | z         |
|------|-----------|-----------|-----------|
| H1   | 3.568167  | -3.695011 | -1.474424 |
| H2   | 0.732305  | -3.264229 | -2.624822 |
| H3   | 0.884335  | -4.533872 | -1.423294 |
| H4   | -5.174581 | -2.625427 | 1.382943  |
| H5   | -0.887741 | -3.667875 | -0.136575 |
| H6   | -1.800926 | -3.946042 | -2.444929 |
| H7   | -2.675097 | -2.657033 | -1.622832 |
| H8   | -1.43412  | -2.256344 | -2.800196 |
| H9   | -1.174961 | 4.706742  | -0.547424 |
| H10  | -3.189478 | 3.40753   | 0.188818  |
| H11  | 1.091025  | 1.162503  | -0.949651 |
| H12  | -4.898633 | 1.63665   | 0.993021  |
| H13  | -6.211997 | -0.388627 | 1.550208  |
| H14  | -2.857691 | -2.87515  | 0.621545  |
| H15  | 5.066781  | -2.230023 | -0.161961 |
| H16  | 0.511613  | 0.265505  | 1.765098  |
| H17  | 2.024694  | 1.504568  | 3.21122   |
| H18  | 4.483446  | 1.189919  | 3.036736  |
| H19  | 5.390951  | -0.475828 | 1.46053   |
| C1   | 1.219312  | -1.595686 | -0.149677 |
| C2   | 3.164722  | -2.885283 | -0.878842 |
| C3   | 1.783408  | -2.649535 | -0.858085 |
| C4   | -0.238081 | -1.60373  | -0.317878 |
| C5   | 0.731174  | -3.459558 | -1.547488 |
| C6   | -0.607089 | -2.967233 | -0.932119 |
| C7   | -1.702263 | -2.95122  | -2.002896 |
| C8   | -1.143963 | 3.630719  | -0.44389  |
| C9   | -2.252591 | 2.904638  | -0.022429 |
| C10  | -2.148178 | 1.523902  | 0.099606  |
| C11  | -0.930175 | 0.866553  | -0.187259 |
| C12  | 0.152659  | 1.609551  | -0.656728 |
| C13  | 0.056281  | 2.995437  | -0.778861 |
| C14  | -3.147235 | 0.519544  | 0.436656  |
| C15  | -4.457458 | 0.654356  | 0.881753  |
| C16  | -5.190536 | -0.484002 | 1.204381  |
| C17  | -3.293622 | -1.88728  | 0.662352  |
| C18  | -2.561029 | -0.762352 | 0.288203  |
| C19  | -1.137479 | -0.595581 | -0.085826 |
| C20  | 3.467819  | -1.062253 | 0.689975  |
| C21  | 2.055771  | -0.824199 | 0.728653  |
| C22  | -4.606741 | -1.746233 | 1.106681  |
| C23  | 3.99467   | -2.078661 | -0.14418  |
| C24  | 1.571977  | 0.099977  | 1.682133  |
| C25  | 2.427034  | 0.795735  | 2.500132  |
| C26  | 3.818811  | 0.611469  | 2.409027  |
| C27  | 4.323306  | -0.306721 | 1.527052  |
| C28  | 1.264635  | 3.822011  | -1.293218 |
| O1   | 1.102642  | 5.062354  | -1.286916 |
| O2   | 2.254992  | 3.149627  | -1.654007 |

Table 2: Coordinates in Angstroms of deprotonated molecular motor anion **1b**.

| Atom | x         | y         | z         |
|------|-----------|-----------|-----------|
| H1   | -0.647193 | -4.357871 | -1.794637 |
| H2   | -0.185809 | -2.919006 | -2.703325 |
| H3   | -3.296000 | -3.464873 | -2.075122 |
| H4   | 6.485345  | -0.221823 | 0.803916  |
| H5   | 5.028176  | 1.770729  | 0.582319  |
| H6   | 3.136653  | -2.798959 | 0.196614  |
| H7   | 5.519115  | -2.488504 | 0.606299  |
| H8   | -4.945000 | -2.117250 | -0.822277 |
| H9   | 3.208811  | 3.496580  | 0.145116  |
| H10  | 1.113226  | 4.781655  | -0.355174 |
| H11  | -1.103368 | 1.209799  | -0.740615 |
| H12  | -0.652374 | 0.156508  | 1.848883  |
| H13  | -2.332897 | 1.299128  | 3.204460  |
| H14  | -4.750673 | 1.008688  | 2.723468  |
| H15  | -5.470469 | -0.509561 | 0.921487  |
| H16  | -0.254008 | -4.085302 | 0.899270  |
| H17  | 0.996538  | -4.996452 | 0.046121  |
| H18  | 1.443054  | -3.739461 | 1.206054  |
| H19  | 1.663867  | -2.974951 | -1.220405 |
| C1   | -1.142868 | -1.548439 | -0.247175 |
| C2   | -2.968070 | -2.725666 | -1.354603 |
| C3   | -1.600288 | -2.522291 | -1.124368 |
| C4   | 2.199641  | 1.596284  | 0.054347  |
| C5   | 2.266874  | 2.982756  | -0.009466 |
| C6   | 1.112945  | 3.701592  | -0.300571 |
| C7   | -0.153687 | 1.659151  | -0.497765 |
| C8   | 0.976804  | 0.920221  | -0.151024 |
| C9   | 0.331236  | -1.565118 | -0.245733 |
| C10  | -0.443236 | -3.288451 | -1.705679 |
| C11  | 5.426957  | -0.342864 | 0.610773  |
| C12  | 4.610553  | 0.776997  | 0.483188  |
| C13  | 3.254240  | 0.608633  | 0.231346  |
| C14  | 2.690496  | -0.684912 | 0.101401  |
| C15  | 3.520643  | -1.793883 | 0.254522  |
| C16  | 4.882923  | -1.619354 | 0.498762  |
| C17  | 1.221211  | -0.543773 | -0.096380 |
| C18  | -3.470061 | -1.057631 | 0.337351  |
| C19  | -2.074497 | -0.841316 | 0.572434  |
| C20  | -0.095473 | 3.051951  | -0.566129 |
| C21  | -1.359525 | 3.869332  | -0.942780 |
| C22  | -3.884015 | -1.982579 | -0.652211 |
| C23  | -1.699808 | 0.005031  | 1.641572  |
| C24  | -2.644917 | 0.643306  | 2.402904  |
| C25  | -4.017412 | 0.473537  | 2.135088  |
| C26  | -4.417534 | -0.364032 | 1.128599  |
| C27  | 0.704772  | -2.975348 | -0.707958 |
| C28  | 0.727846  | -4.009083 | 0.429566  |
| O1   | -1.223747 | 5.111977  | -0.895092 |
| O2   | -2.362691 | 3.188848  | -1.248973 |

Table 3: Coordinates in Angstroms of deprotonated molecular motor anion **1c**.

| Atom | x         | y         | z         |
|------|-----------|-----------|-----------|
| H1   | 1.271285  | -2.950272 | -2.570259 |
| H2   | 1.234617  | -4.092847 | -1.239583 |
| H3   | 4.005230  | -3.572825 | -1.251541 |
| H4   | -0.464729 | -2.889314 | -0.121260 |
| H5   | -1.310969 | -3.332642 | -2.429704 |
| H6   | -2.090756 | -1.910868 | -1.759455 |
| H7   | -0.787155 | -1.721265 | -2.931495 |
| H8   | 0.287452  | 5.356085  | -1.501702 |
| H9   | -1.875614 | 4.393822  | -0.770540 |
| H10  | 2.132057  | 1.501180  | -1.270051 |
| H11  | 2.266770  | 3.901319  | -1.768142 |
| H12  | -3.849235 | 2.955101  | 0.119910  |
| H13  | -5.431810 | 1.137360  | 0.809501  |
| H14  | -2.406183 | -1.781661 | 0.440578  |
| H15  | 1.295093  | 0.961004  | 1.480822  |
| H16  | 2.874549  | 2.145358  | 2.909718  |
| H17  | 5.292133  | 1.560262  | 2.876887  |
| H18  | 6.073260  | -0.316680 | 1.481735  |
| H19  | 5.616379  | -2.167701 | -0.009420 |
| C1   | 1.871026  | -1.098119 | -0.255818 |
| C2   | 3.678141  | -2.664580 | -0.760371 |
| C3   | 2.333104  | -2.276247 | -0.831405 |
| C4   | -0.078417 | -2.324764 | -0.976289 |
| C5   | -1.136700 | -2.312062 | -2.082147 |
| C6   | 0.215054  | 4.300731  | -1.271159 |
| C7   | -0.998491 | 3.764253  | -0.849598 |
| C8   | -1.078390 | 2.407789  | -0.556960 |
| C9   | 0.064287  | 1.576709  | -0.663603 |
| C10  | 1.258736  | 2.120167  | -1.128724 |
| C11  | 1.332215  | 3.480616  | -1.420207 |
| C12  | 0.431248  | -0.952988 | -0.498401 |
| C13  | 1.213182  | -3.028075 | -1.479411 |
| C14  | -2.217944 | 1.580954  | -0.178642 |
| C15  | -3.523949 | 1.921593  | 0.152000  |
| C16  | -4.405688 | 0.919436  | 0.546481  |
| C17  | -2.679585 | -0.744013 | 0.319258  |
| C18  | -1.792026 | 0.234835  | -0.125502 |
| C19  | -0.343782 | 0.173194  | -0.411104 |
| C20  | 4.132896  | -0.748130 | 0.650972  |
| C21  | 2.756036  | -0.352626 | 0.596401  |
| C22  | -3.994008 | -0.413382 | 0.642959  |
| C23  | -4.979480 | -1.518853 | 1.103881  |
| C24  | 4.570923  | -1.890345 | -0.063460 |
| C25  | 2.338088  | 0.692840  | 1.453061  |
| C26  | 3.229053  | 1.357143  | 2.258976  |
| C27  | 4.596034  | 1.018204  | 2.250161  |
| C28  | 5.031592  | -0.019654 | 1.468604  |
| O1   | -6.136018 | -1.127150 | 1.369919  |
| O2   | -4.497894 | -2.673247 | 1.150618  |

Table 4: Coordinates in Angstroms of deprotonated molecular motor anion **1d**.



| Atom | x         | y         | z         |
|------|-----------|-----------|-----------|
| H1   | -3.791594 | -3.306789 | -1.965775 |
| H2   | -1.065252 | -3.902782 | -1.603446 |
| H3   | -0.757570 | -2.527200 | -2.657862 |
| H4   | -5.568785 | -2.039943 | -0.814440 |
| H5   | -0.267713 | 5.463225  | -1.098158 |
| H6   | 1.922755  | 4.461794  | -0.521935 |
| H7   | -2.116607 | 1.609711  | -0.998391 |
| H8   | -2.253325 | 4.021241  | -1.363400 |
| H9   | -1.537536 | 0.845823  | 1.666955  |
| H10  | -3.328516 | 1.887126  | 2.961626  |
| H11  | -5.703802 | 1.318530  | 2.514486  |
| H12  | -6.260296 | -0.37893  | 0.818138  |
| H13  | 3.917320  | 3.018966  | 0.039266  |
| H14  | 5.592108  | 1.230549  | 0.434039  |
| H15  | 2.549464  | -1.75384  | 0.205509  |
| H16  | -0.676614 | -3.350365 | 1.039070  |
| H17  | 0.666598  | -4.181665 | 0.248753  |
| H18  | 0.971191  | -2.790738 | 1.289021  |
| H19  | 1.089751  | -2.226916 | -1.204204 |
| C1   | -1.850570 | -1.034924 | -0.317848 |
| C2   | -3.541806 | -2.478778 | -1.315209 |
| C3   | -2.201592 | -2.120783 | -1.109251 |
| C4   | -0.185495 | 4.398170  | -0.929380 |
| C5   | 1.040798  | 3.839401  | -0.595970 |
| C6   | 1.120735  | 2.467197  | -0.385854 |
| C7   | -0.020467 | 1.637799  | -0.477848 |
| C8   | -1.234014 | 2.210994  | -0.857718 |
| C9   | -1.307891 | 3.582588  | -1.073968 |
| C10  | -0.385895 | -0.896223 | -0.337159 |
| C11  | -0.972480 | -2.816110 | -1.624928 |
| C12  | 2.280421  | 1.629252  | -0.132248 |
| C13  | 3.612891  | 1.981417  | 0.060508  |
| C14  | 4.549575  | 0.986521  | 0.283787  |
| C15  | 2.805374  | -0.709458 | 0.139646  |
| C16  | 1.858377  | 0.275969  | -0.107464 |
| C17  | 0.386447  | 0.226992  | -0.283743 |
| C18  | -4.214493 | -0.740527 | 0.244703  |
| C19  | -2.848835 | -0.363979 | 0.453738  |
| C20  | 4.144031  | -0.351286 | 0.323951  |
| C21  | 5.132935  | -1.401783 | 0.570865  |
| C22  | -4.528542 | -1.778130 | -0.668480 |
| C23  | -2.564694 | 0.586041  | 1.462438  |
| C24  | -3.571831 | 1.169753  | 2.189511  |
| C25  | -4.919600 | 0.841471  | 1.942553  |
| C26  | -5.229749 | -0.098012 | 0.994446  |
| C27  | 0.140691  | -2.288919 | -0.677313 |
| C28  | 0.286916  | -3.204186 | 0.549279  |
| O1   | 6.363169  | -1.201217 | 0.771804  |
| O2   | 4.878206  | -2.636357 | 0.613757  |

Table 5: Coordinates in Angstroms of deprotonated molecular motor **1a** in its neutral radical form.

| Atom | x         | y         | z         |
|------|-----------|-----------|-----------|
| H1   | 3.568167  | -3.695011 | -1.474424 |
| H2   | 0.732305  | -3.264229 | -2.624822 |
| H3   | 0.884335  | -4.533872 | -1.423294 |
| H4   | -5.174581 | -2.625427 | 1.382943  |
| H5   | -0.887741 | -3.667875 | -0.136575 |
| H6   | -1.800926 | -3.946042 | -2.444929 |
| H7   | -2.675097 | -2.657033 | -1.622832 |
| H8   | -1.434120 | -2.256344 | -2.800196 |
| H9   | -1.174961 | 4.706742  | -0.547424 |
| H10  | -3.189478 | 3.407530  | 0.188818  |
| H11  | 1.091025  | 1.162503  | -0.949651 |
| H12  | -4.898633 | 1.636650  | 0.993021  |
| H13  | -6.211997 | -0.388627 | 1.550208  |
| H14  | -2.857691 | -2.875150 | 0.621545  |
| H15  | 5.066781  | -2.230023 | -0.161961 |
| H16  | 0.511613  | 0.265505  | 1.765098  |
| H17  | 2.024694  | 1.504568  | 3.211220  |
| H18  | 4.483446  | 1.189919  | 3.036736  |
| H19  | 5.390951  | -0.475828 | 1.460530  |
| C1   | 1.219312  | -1.595686 | -0.149677 |
| C2   | 3.164722  | -2.885283 | -0.878842 |
| C3   | 1.783408  | -2.649535 | -0.858085 |
| C4   | -0.238081 | -1.603730 | -0.317878 |
| C5   | 0.731174  | -3.459558 | -1.547488 |
| C6   | -0.607089 | -2.967233 | -0.932119 |
| C7   | -1.702263 | -2.951220 | -2.002896 |
| C8   | -1.143963 | 3.630719  | -0.443890 |
| C9   | -2.252591 | 2.904638  | -0.022429 |
| C10  | -2.148178 | 1.523902  | 0.099606  |
| C11  | -0.930175 | 0.866553  | -0.187259 |
| C12  | 0.152659  | 1.609551  | -0.656728 |
| C13  | 0.056281  | 2.995437  | -0.778861 |
| C14  | -3.147235 | 0.519544  | 0.436656  |
| C15  | -4.457458 | 0.654356  | 0.881753  |
| C16  | -5.190536 | -0.484002 | 1.204381  |
| C17  | -3.293622 | -1.887280 | 0.662352  |
| C18  | -2.561029 | -0.762352 | 0.288203  |
| C19  | -1.137479 | -0.595581 | -0.085826 |
| C20  | 3.467819  | -1.062253 | 0.689975  |
| C21  | 2.055771  | -0.824199 | 0.728653  |
| C22  | -4.606741 | -1.746233 | 1.106681  |
| C23  | 3.994670  | -2.078661 | -0.144180 |
| C24  | 1.571977  | 0.099977  | 1.682133  |
| C25  | 2.427034  | 0.795735  | 2.500132  |
| C26  | 3.818811  | 0.611469  | 2.409027  |
| C27  | 4.323306  | -0.306721 | 1.527052  |
| C28  | 1.264635  | 3.822011  | -1.293218 |
| O1   | 1.102642  | 5.062354  | -1.286916 |
| O2   | 2.254992  | 3.149627  | -1.654007 |

Table 6: Coordinates in Angstroms of deprotonated molecular motor **1b** in its neutral radical form.

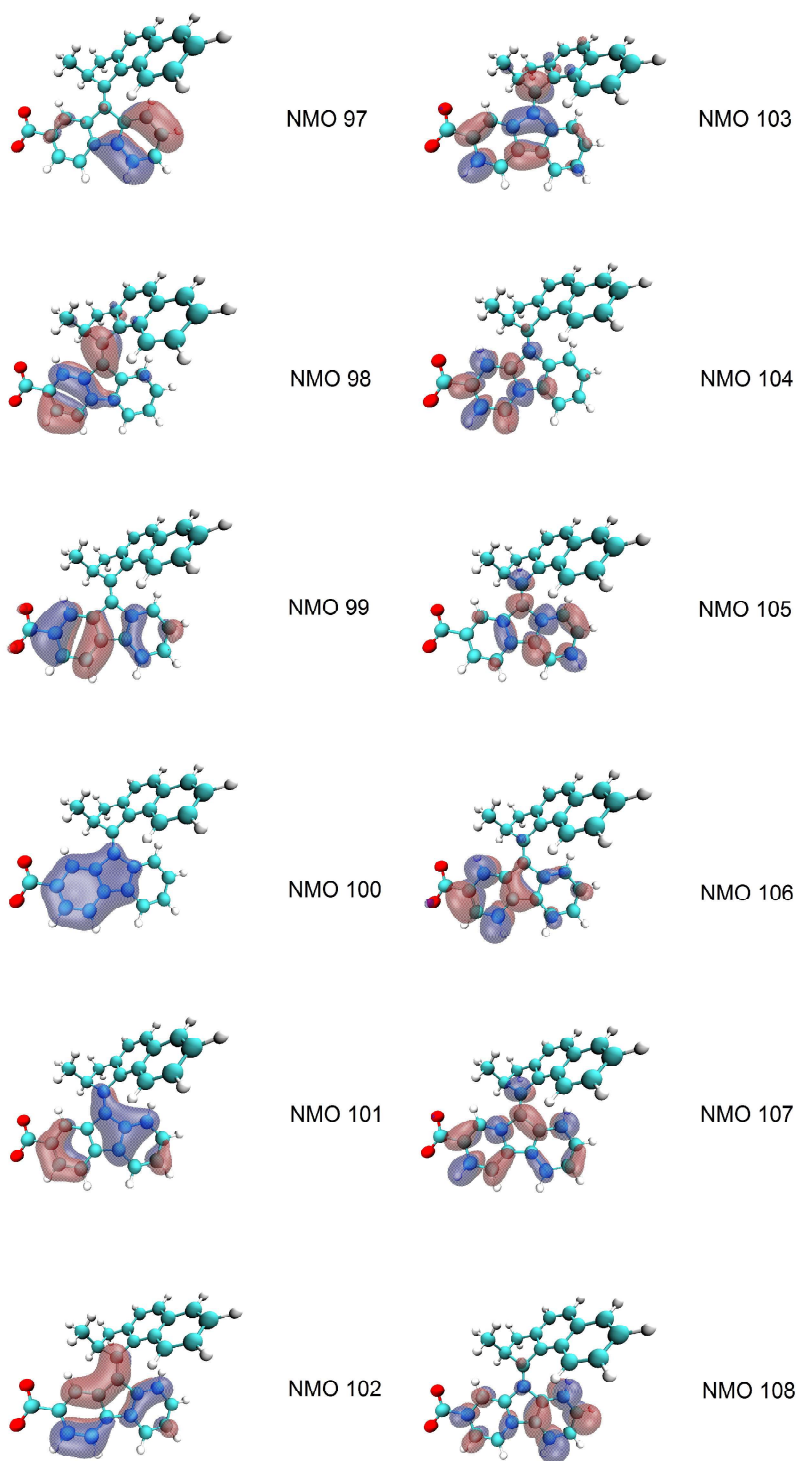

Fig. 5: Natural orbitals comprising the 12 electron, 12 orbital active space used in state-averaged CASSCF calculations of the deprotonated molecular motor anion **1a**.

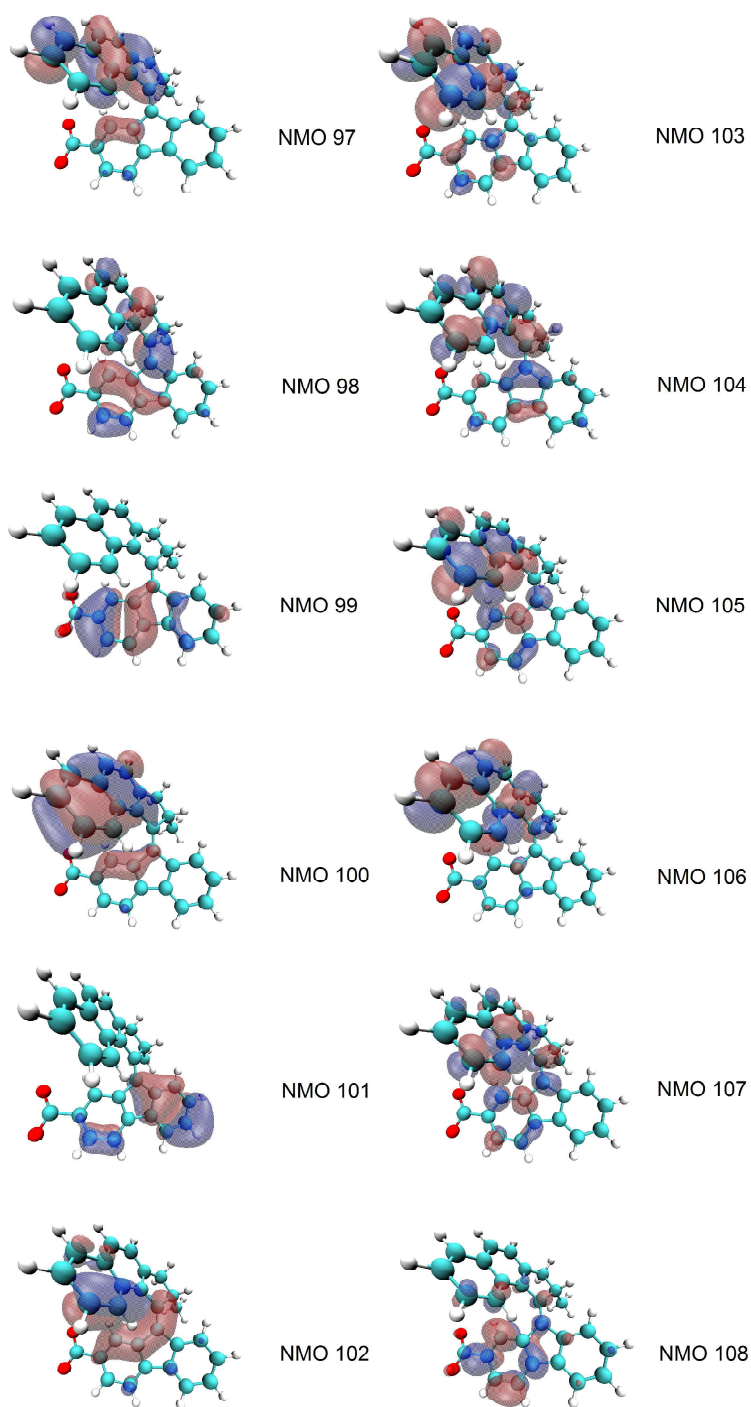

Fig. 6: Natural orbitals comprising the 12 electron, 12 orbital active space used in state-averaged CASSCF calculations of the deprotonated molecular motor anion **1b**.

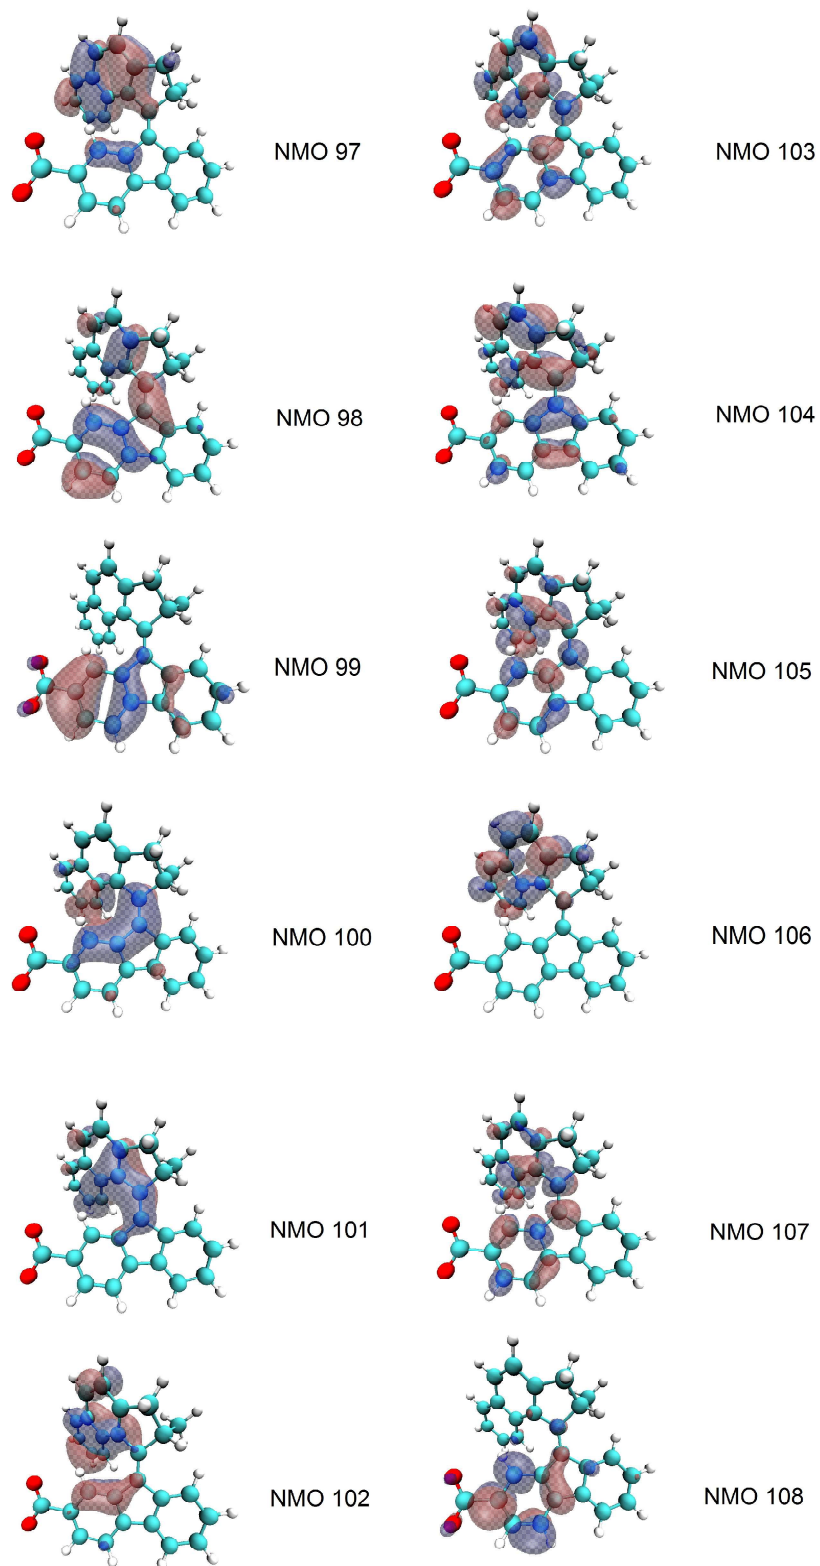

Fig. 7: Natural orbitals comprising the 12 electron, 12 orbital active space used in state-averaged CASSCF calculations of the deprotonated molecular motor anion **1c**.

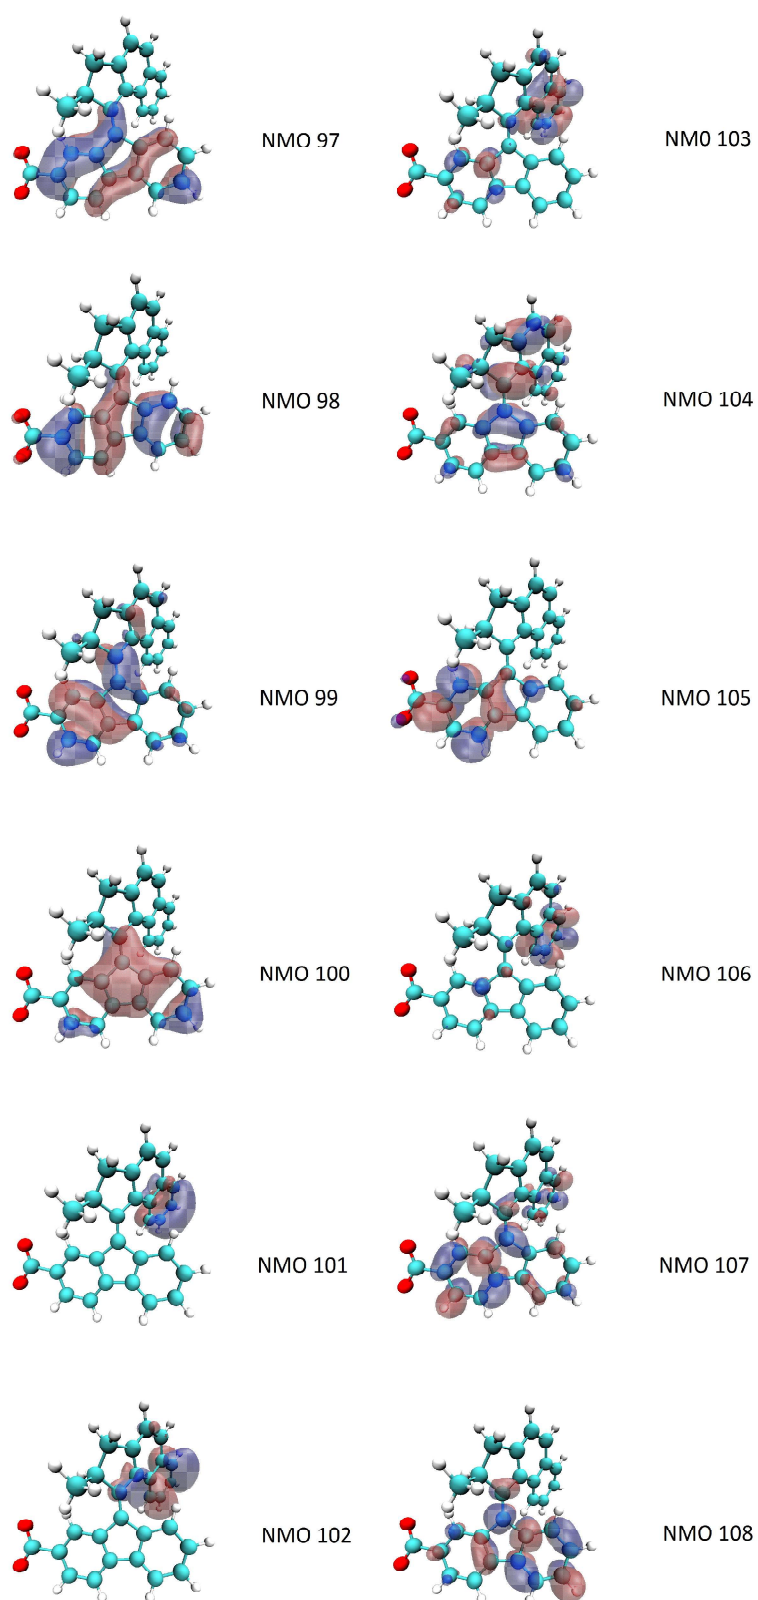

Fig. 8: Natural orbitals comprising the 12 electron, 12 orbital active space used in state-averaged CASSCF calculations of the deprotonated molecular motor anion **1d**.

### 3 References

- [1] J. Vicario, M. Walko, A. Meetsma and B. L. Feringa, *J. Am. Chem. Soc.*, 2006, **128**, 5127–5135.
- [2] A. Moritomo, H. Yamada, T. Watanabe, H. Itahana, Y. Koga, S. Akuzawa and M. Okada, *Bioorganic Med. Chem.*, 2014, **22**, 4323–4337.
